# Supplementary material for: Glucose oxidase-encapsulated liposomes for amplified autofluorescence-free immunoassay of a prostate-specific antigen with photoluminescence of CePO4:Tb nanocrystals
Source: Royal Society of Chemistry journal article supplement (doi:10.1039/d2an01689c), 2022-01-01
Supplement: d2an01689c1.pdf [file d2an01689c1.pdf]

## SUPPORTING INFORMATION

### Glucose oxidase-encapsulated liposomes for amplified autofluorescence-free immunoassay of prostate-specific antigen with photoluminescence of CePO<sub>4</sub>:Tb nanocrystals

Xiwen Jiang,<sup>a,†</sup> Cuiyuan Pan,<sup>a,†</sup> Qiaowen Wang,<sup>a,†</sup> Zipeng Yin,<sup>b,†</sup> Xiao Han<sup>a,\*</sup> and Dianping Tang<sup>a,b,\*</sup>

<sup>a</sup> College of Biological Science and Engineering, Fuzhou University, Fuzhou 350108, PR China

<sup>b</sup> Key Laboratory for Analytical Science of Food Safety and Biology (MOE & Fujian Province), Department of Chemistry, Fuzhou University, Fuzhou 350108, PR China

---

\* Corresponding authors.

*E-mail addresses:* [hanxiao@fzu.edu.cn](mailto:hanxiao@fzu.edu.cn) (X. Han); [dianping.tang@fzu.edu.cn](mailto:dianping.tang@fzu.edu.cn) (D. Tang).

<sup>†</sup> Jiang, Pan, Wang and Yin have contributed equally to this work.

## TABLE OF CONTENTS

|                                                                                           |    |
|-------------------------------------------------------------------------------------------|----|
| Reagents and chemicals .....                                                              | S3 |
| Apparatus .....                                                                           | S3 |
| Figure S1. Particle size distribution of liposomes.....                                   | S4 |
| Figure S2. PL intensity of CPOT at different pH. ....                                     | S4 |
| Table S1. Comparison of the methods for PSA detection developed by other researchers..... | S5 |
| References .....                                                                          | S6 |

## Reagents and chemicals

PSA ELISA kit containing PSA standards, glucose oxidase (GOD), bovine serum albumin (BSA), monoclonal anti-human PSA capture antibody (mAb<sub>1</sub>), monoclonal anti-human PSA detection antibody (mAb<sub>2</sub>) and all buffer solutions were purchased from Sangon-Biotech (Shanghai, China); High-binding polystyrene 96-well microplates were obtained from Greiner Bio-One (Frickenhausen, Germany); 1,2-dipalmitoyl-sn-glycero-3-phosphocholine (DPPC), 1,2-dipalmitoyl-sn-glycero-3-phosphoethanolamine (DPPE), glutaraldehyde (AR, 50 wt %) , Triton X-100, citric acid monohydrate, glucose, Ce(NO<sub>3</sub>)<sub>3</sub>·6H<sub>2</sub>O (99.95%), Tb(NO<sub>3</sub>)<sub>3</sub>·6H<sub>2</sub>O (99.9%) were purchased from Aladdin (Shanghai); Chloroform, cholesterol and concentrated phosphoric acid were procured from Sinopharm Chem. Re. Co., Ltd. All other reagents used were A.R. grade. Ultrapure water with a resistivity of 18 MΩ\*cm (purified by a Millipore water purification system) was used in all steps.

## Apparatus

X-ray diffraction (XRD) patterns were collected using an X-ray diffractometer (RigakuUltima III) with high-intensity Cu Kα1 irradiation ( $\lambda = 1.5406$  nm). X-ray photoelectron spectra (XPS) were recorded on a Kratos standard and monochromatic source (Al KR) operated at 15 kV and 10 mA. Transmission electron microscopy (TEM) was performed on a JEOL JEM-2100 microscope at an acceleration voltage of 200 kV, and Zetasizer Nano-ZS90 (Malvern) was also used. Photoluminescence spectra and luminescence decay curves were recorded on an F-4600 fluorescence spectrophotometer (Hitachi, Japan).

## Preparation of mAb1-coated microplate

Briefly, 50  $\mu$ L of mAb<sub>1</sub> (10  $\mu$ g/mL) was injected into the wells of a high binding polystyrene microplate as a PSA capture unit and incubated overnight at 4 °C. PBS buffer (0.1 M, pH 7.4) containing 0.05% Tween 20 was used as a washing solution to wash away unbound mAb<sub>1</sub> antibody. Subsequently, non-specific binding sites were blocked by incubation with blocking buffer (10 mM PBS containing 1.0 wt% BSA, pH 7.4) for 1 h at 4 °C and the remaining BSA was removed by washing with washing solution.

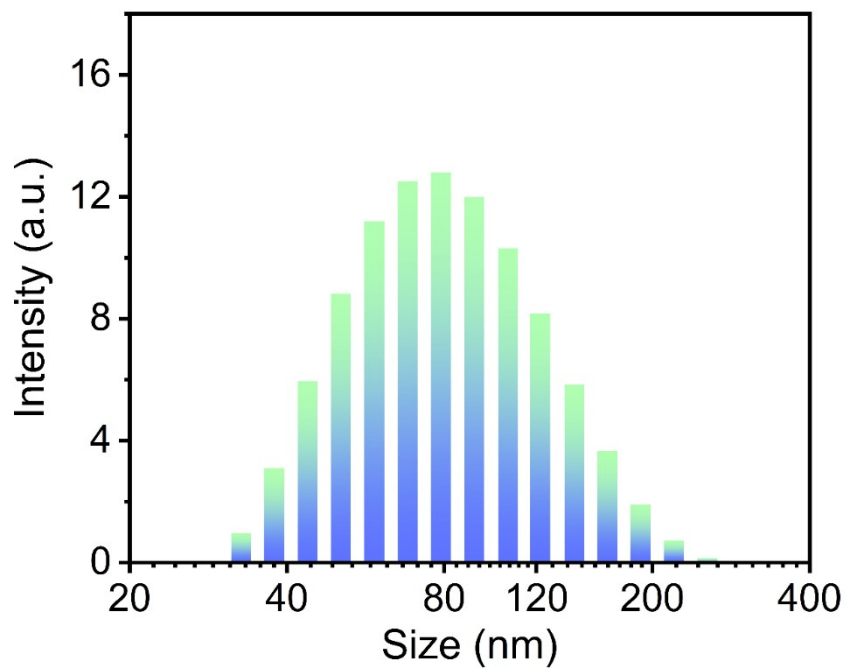

**Figure S1.** Particle size distribution of liposomes.

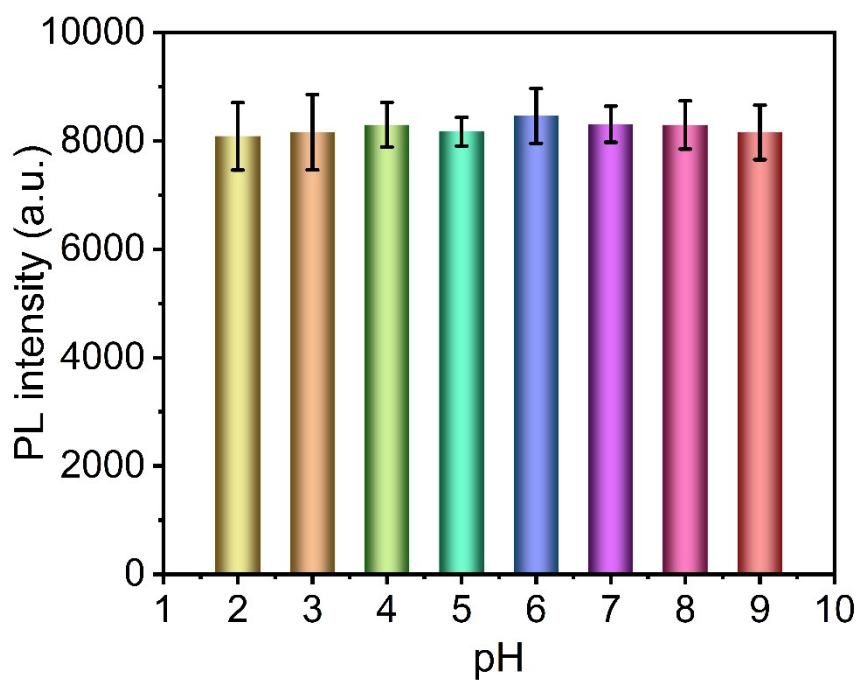

**Figure S2.** PL intensity of CPOT at different pH values.

**Table S1.** Comparison of the methods for PSA detection developed by other researchers.

| Method                             | Materials                                                                       | Linear range<br>(ng/mL) | LOD (pg mL <sup>-1</sup> ) | Refs      |
|------------------------------------|---------------------------------------------------------------------------------|-------------------------|----------------------------|-----------|
| Persistent luminescence assay      | Zn <sub>2</sub> GeO <sub>4</sub> : Mn <sup>2+</sup> , Pr <sup>3+</sup> nanorods | 0.005-25                | 3.25                       | This work |
| Persistent luminescence aptasensor | ZnGeO:Mo NRs and<br>Au@Ag@SiO <sub>2</sub> NPs                                  | 0-10                    | 9.2                        | [1]       |
| Immunochromatography test strip    | semiconducting polymer dots                                                     | 2-10                    | 320                        | [2]       |
| Fluorescence aptasensor            | carbon dots (CDs) and graphene<br>oxide (GO)                                    | 1-100                   | 220                        | [3]       |
| SERS immunosensor                  | Cu <sub>2-x</sub> S <sub>y</sub> Se <sub>1-y</sub> NPs and Ag NPs               | 3-120                   | 2490                       | [4]       |
| Photoelectrochemical immunosensor  | CuS QDs and CdS@g-<br>C <sub>3</sub> N <sub>4</sub> heterojunction              | 0.01-50                 | 4                          | [5]       |
| Electrochemical aptasensors        | poly A aptamer and AuNPs                                                        | 0.1-100                 | 20                         | [6]       |

## References

1. Y. Zhao, F. Zheng, L. Shi, H. Liu and W. Ke, *ACS Appl Mater Interfaces*, 2019, **11**, 40669-40676.
2. Y. Yang, Y. Yang, M. Liu and Y. Chan, *Anal. Chem.*, 2020, **92**, 1493-1501.
3. J. He, Y. Cheng, Q. Zhang, H. Liu and C. Huang, *Talanta*, 2020, **219**, 121276.
4. L. Yang, M. Gao, H. Zou, Y. Li and C. Huang, *Anal. Chem.*, 2018, **90**, 11728-11733.
5. Y. Dong, J. Cao, B. Wang, S. Ma and Y. Liu, *ACS Appl Mater Interfaces*, 2018, **10**, 3723-3731.
6. O. Shayesteh and R. Ghavami, *Spectrochim. Acta. A Mol. Biomol. Spectrosc.*, 2020, **226**, 117644.
